# Supplementary material
Source: MDPI journal article supplement (https://www.mdpi.com/2073-4441/11/6/1268)
Supplement: s1 [file s1]

# Using real-time data and unsupervised machine learning techniques to study large-scale spatio-temporal characteristics of wastewater discharges and their influence on surface water quality in the Yangtze River Basin

Zhenzhen Di<sup>1</sup>, Miao Chang<sup>1\*</sup>, Peikun Guo<sup>1</sup>, Yang Li<sup>2</sup>, Yin Chang<sup>2</sup>

1 School of Environment, Tsinghua University, 100084, Beijing, China

2 Green Nest Smart Data Technologies (Beijing) Co. Ltd, 77 Shuangqing Rd, 100084, Beijing, China

## Supplementary Material

### Figures

- Figure S 1 Numbers of the wastewater-generating factories ranked in order of the top 10 industries in the YRB that published online monitoring data in 2016 (A) and in 2017 (B). (In the pie charts, numbers before the semicolon represent the sum of factories in a specific category and percentages after the semicolon represents the ratio of the YRB factories.).....3
- Figure S 2 Yearly concentration means of chemical oxygen demand (COD), ammonia nitrogen (NH<sub>3</sub>-N), dissolved oxygen (DO) and pH at the 18 surface water sections (sites) in the Yangtze River Basin (YRB) in 2016 (A) and 2017 (B) by hierarchical clustering with the Ward.D method (NH: NH<sub>3</sub>-N. The deeper the color is, the larger the value of some indicator is.) .....3
- Figure S 3 Weekly water quality grades at the 18 YRB sites in 2016 (A) and 2017 (B). .....4
- Figure S 4 COD and NH<sub>3</sub>-N weekly means in the YRB wastewater discharges in different spatial (PAM2 and PAM3) and water quality clusters (HPW clusters—clusters of heavily polluted wastewater: A, C, E and G; UPW clusters—clusters of unpolluted wastewater: B, D, F and H) in 2016 (A, B, C and D) and 2017 (E, F, G and H) .....5

### Tables

- Table S 1 Basic information of the YRB sites, sewage outlets and their factories with monitoring data published online in 2016 and 2017 (from west to east). .....6
- Table S 2 Industrial class list and numbers of the YRB wastewater-generating factories in 2016 and 2017 ..... 7
- Table S 3 Partitioning around medoids (PAM) and expectation–maximization (EM) clustering

---

\* Corresponding author at: School of Environment, Tsinghua University, 100084, Beijing, China.  
E-mail addresses: changmiao@tsinghua.edu.cn (Chang, M.), [dzz17@tsinghua.org.cn](mailto:dzz17@tsinghua.org.cn) (Di, Z.).

|                                                                                                                                                                                                  |    |
|--------------------------------------------------------------------------------------------------------------------------------------------------------------------------------------------------|----|
| methods based on yearly/weekly means of COD, NH <sub>3</sub> -N, pH and DO in wastewater discharges from the sewage outlets and in surface water from the sites in the YRB in 2016 and 2017..... | 9  |
| Table S 4 Numbers and administrative regions of the 18 YRB sites and the 2213 YRB wastewater-generating factories in different spatial PAM clusters in 2016 and 2017.....                        | 10 |
| Table S 5 Unpolluted week percentages and yearly means of pH, DO, COD and NH <sub>3</sub> -N in surface water at the YRB sites in 2016 and 2017.....                                             | 11 |
| Table S 6 Numbers and percentages of YRB sewage outlets in each EM cluster based on the yearly means of COD, NH <sub>3</sub> -N, and pH in wastewater discharged in 2016 and 2017.....           | 12 |
| Table S 7 YRB sewage outlet numbers in Clusters HPW (heavily polluted wastewater) and UPW (unpolluted wastewater) in different industries by EM clustering in 2016 and 2017.....                 | 13 |
| Table S 8 Numbers of the YRB factories with heavily polluted wastewater discharges (HPW) and their administrative regions and industrial classes in the heavily polluted zone (HPZ) in 2016..... | 14 |
| Table S 9 Numbers of the YRB factories with heavily polluted wastewater discharges (HPW) and their administrative regions and industrial classes in the heavily polluted zone (HPZ) in 2017..... | 15 |

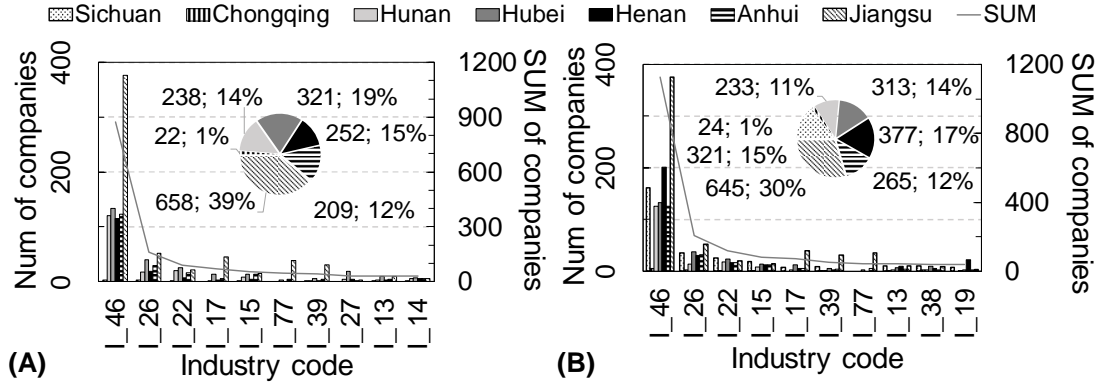

Figure S 1 Numbers of the wastewater-generating factories ranked in order of the top 10 industries in the YRB that published online monitoring data in 2016 (A) and in 2017 (B). (In the pie charts, numbers before the semicolon represent the sum of factories in a specific category and percentages after the semicolon represents the ratio of the YRB factories.)

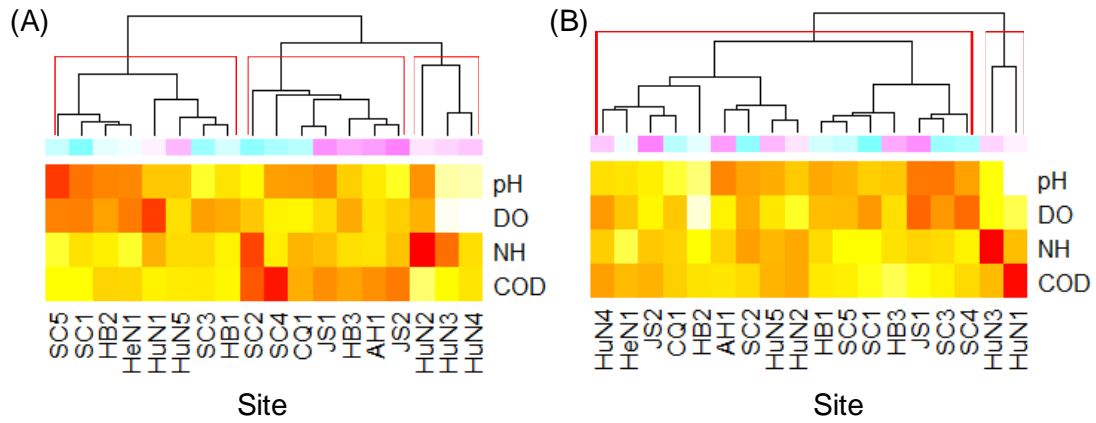

Figure S 2 Yearly concentration means of chemical oxygen demand (COD), ammonia nitrogen (NH<sub>3</sub>-N), dissolved oxygen (DO) and pH at the 18 surface water sections (sites) in the Yangtze River Basin (YRB) in 2016 (A) and 2017 (B) by hierarchical clustering with the Ward.D method (NH: NH<sub>3</sub>-N. The deeper the color is, the larger the value of some indicator is.).

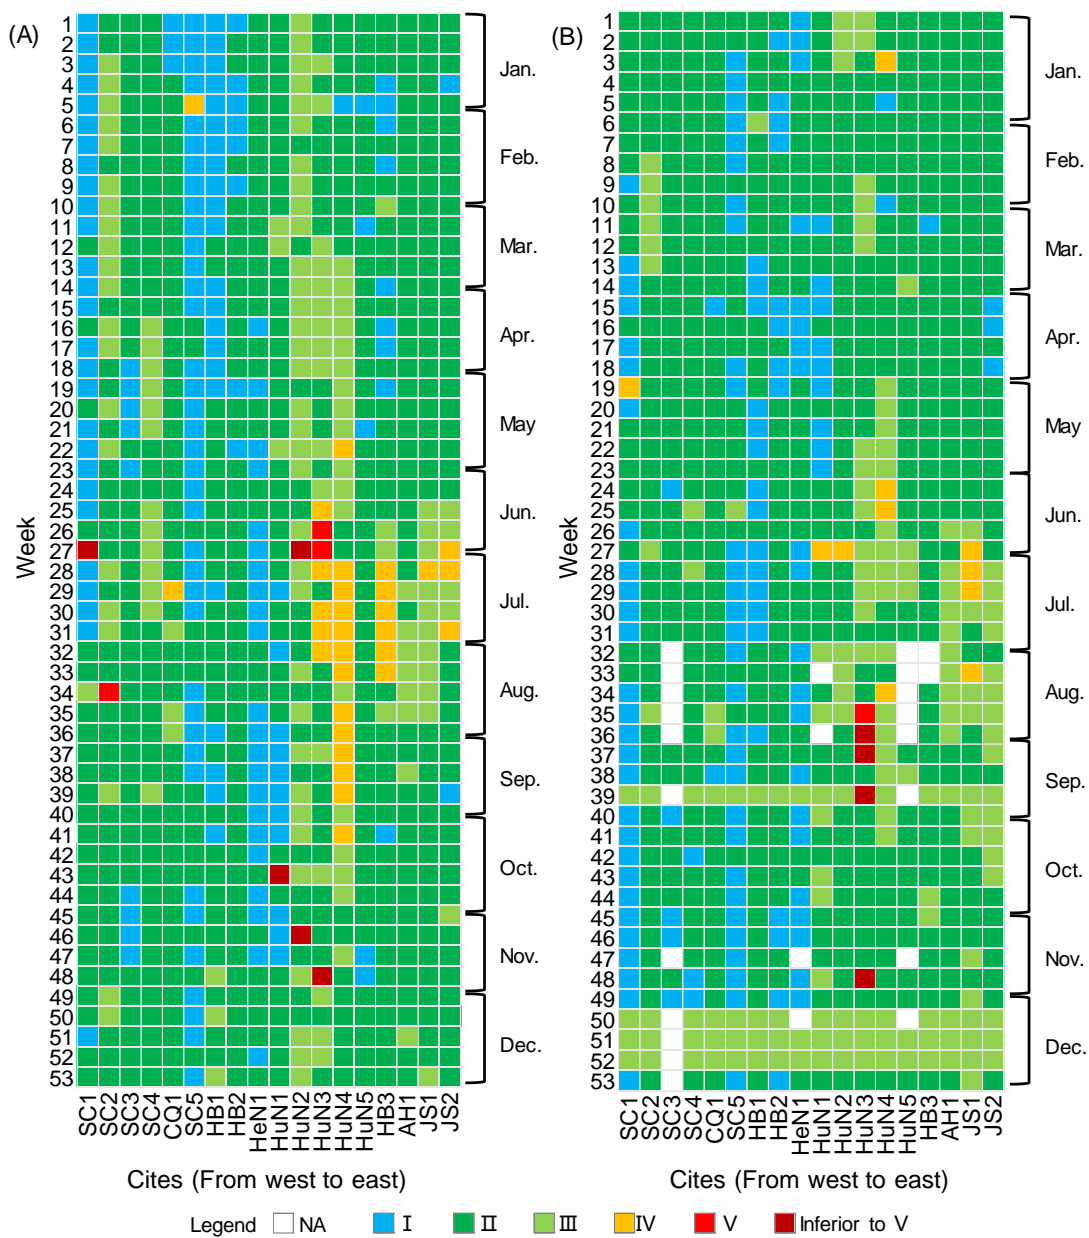

Figure S 3 Weekly water quality grades at the 18 YRB sites in 2016 (A) and 2017 (B).

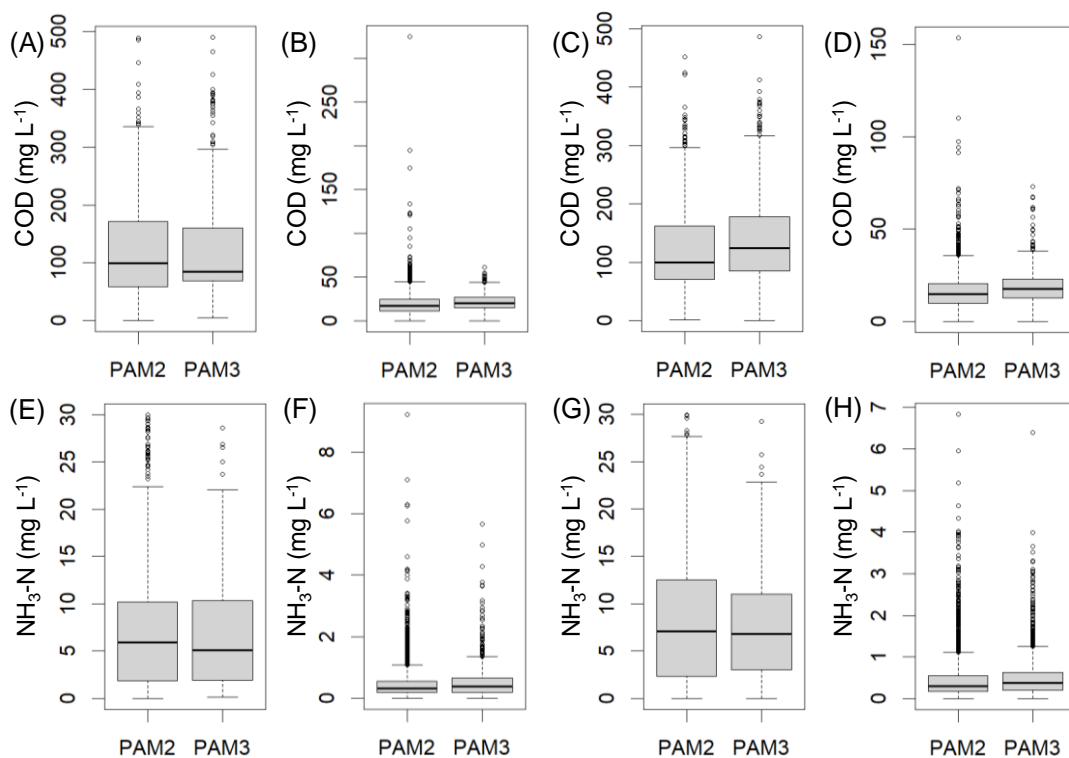

Figure S 4 COD and NH<sub>3</sub>-N weekly means in the YRB wastewater discharges in different spatial (PAM2 and PAM3) and water quality clusters (HPW clusters—clusters of heavily polluted wastewater: A, C, E and G; UPW clusters—clusters of unpolluted wastewater: B, D, F and H) in 2016 (A, B, C and D) and 2017 (E, F, G and H)

Table S 1 Basic information of the YRB sites, sewage outlets and their factories with monitoring data published online in 2016 and 2017 (from west to east).

| NO. | Site Code | River Name            | the YRB Reaches | Longitude (East) | Latitude (North) | AR Name        | City Number | Sewage Outlet Number | Factory Number | Wastewater Data Availability |      |
|-----|-----------|-----------------------|-----------------|------------------|------------------|----------------|-------------|----------------------|----------------|------------------------------|------|
|     |           |                       |                 |                  |                  |                |             |                      |                | 2016                         | 2017 |
| 1   | SC1       | Yangtze River         | Upper           | 101.66°E         | 26.59°N          |                |             |                      |                |                              |      |
| 2   | SC2       | Minjiang River        | Upper           | 103.76°E         | 29.51°N          |                |             |                      |                |                              |      |
| 3   | SC3       | Minjiang River        | Upper           | 104.43°E         | 28.78°N          | Sichuan (SC)   | 21          | 335                  | 321            | No                           | Yes  |
| 4   | SC4       | Tuojiang River        | Upper           | 105.45°E         | 28.90°N          |                |             |                      |                |                              |      |
| 5   | SC5       | Jialing River         | Upper           | 105.88°E         | 32.67°N          |                |             |                      |                |                              |      |
| 6   | CQ1       | Yangtze River         | Upper           | 105.85°E         | 29.02°N          | Chongqing (CQ) | 9           | 28                   | 24             | Yes                          | Yes  |
| 7   | HuN1      | Yuan River            | Middle          | 112.13°E         | 28.92°N          |                |             |                      |                |                              |      |
| 8   | HuN2      | Lishui River          | Middle          | 112.13°E         | 29.47°N          |                |             |                      |                |                              |      |
| 9   | HuN3      | Zishui River          | Middle          | 112.63°E         | 28.80°N          | Hunan (HuN)    | 15          | 272                  | 241            | Yes                          | Yes  |
| 10  | HuN4      | Xiangjiang River      | Middle          | 112.84°E         | 28.34°N          |                |             |                      |                |                              |      |
| 11  | HuN5      | Yangtze River         | Middle          | 113.23°E         | 29.54°N          |                |             |                      |                |                              |      |
| 12  | HB1       | Yangtze River         | Middle          | 111.27°E         | 30.76°N          |                |             |                      |                |                              |      |
| 13  | HB2       | Danjiangkou Reservoir | Middle          | 111.50°E         | 32.57°N          | Hubei (HB)     | 14          | 356                  | 322            | Yes                          | Yes  |
| 14  | HB3       | Han River             | Middle          | 114.22°E         | 30.58°N          |                |             |                      |                |                              |      |
| 15  | HeN1      | Danjiangkou Reservoir | Middle          | 111.71°E         | 32.67°N          | Henan (HeN)    | 18          | 416                  | 378            | Yes                          | Yes  |
| 16  | AH1       | Yangtze River         | Lower           | 117.03°E         | 30.50°N          | Anhui (AH)     | 16          | 298                  | 269            | Yes                          | Yes  |
| 17  | JS1       | Yangtze River         | Lower           | 118.52°E         | 31.89°N          |                |             |                      |                |                              |      |
| 18  | JS2       | Jiajiang River        | Lower           | 119.65°E         | 32.35°N          | Jiangsu (JS)   | 13          | 681                  | 658            | Yes                          | Yes  |
| SUM |           |                       |                 |                  |                  | 7              | 106         | 2386                 | 2213           |                              |      |

Table S 2 Industrial class list and numbers of the YRB wastewater-generating factories in 2016 and 2017

| Industry Code | Industry Name<br>Acronym | Full Industry Name                                                     | SUM in 2016 | SUM in 2017 | ISIC.Rev.4<br>Division ID | ISIC.Rev.4<br>Name                                                                                                                                                                                |
|---------------|--------------------------|------------------------------------------------------------------------|-------------|-------------|---------------------------|---------------------------------------------------------------------------------------------------------------------------------------------------------------------------------------------------|
| I_46          | WPS                      | Water production and supply                                            | 872         | 1126        | 36 & 37                   | Water collection, treatment and supply & Sewerage                                                                                                                                                 |
| I_26          | CCPM                     | Manufacture of chemicals and chemical products                         | 160         | 205         | 20                        | Manufacture of chemicals and chemical products                                                                                                                                                    |
| I_22          | PMPA                     | Manufacture of paper articles of paper                                 | 91          | 121         | 17                        | Manufacture of paper and paper products                                                                                                                                                           |
| I_15          | BM                       | Manufacture of beverages                                               | 55          | 80          | 10 & 11                   | Manufacture of food products & Manufacture of beverages                                                                                                                                           |
| I_17          | TI                       | Textile industry                                                       | 69          | 71          | 13                        | Manufacture of textiles                                                                                                                                                                           |
| I_39          | CCOEEM                   | Manufacture of computers, communication and other electrical equipment | 44          | 53          | 26                        | Manufacture of computer, electronic and optical products                                                                                                                                          |
| I_77          | EPER                     | Ecological protection and environmental restoration                    | 45          | 45          | 38 & 39<br>& 91           | Waste collection, treatment and disposal activities; materials recovery & Remediation activities and other waste management services & Libraries, archives, museums and other cultural activities |
| I_13          | ASFP                     | Processing of agricultural and sideline foods                          | 30          | 44          | 10                        | Manufacture of food products                                                                                                                                                                      |
| I_38          | EMEM                     | Manufacture of electrical machinery and equipment                      | 27          | 40          | 27                        | Manufacture of electrical equipment                                                                                                                                                               |
| I_19          | LFFF                     | Leather, fur, feather and related products and manufacture of footwear | 19          | 39          | 14 & 15                   | Manufacture of wearing apparel & Manufacture of leather and related products                                                                                                                      |
| I_27          | PMCM                     | Manufacture of pharmaceuticals and medicinal chemical                  | 32          | 38          | 21                        | Manufacture of pharmaceuticals, medicinal chemical and botanical products                                                                                                                         |
| I_32          | SCPNFM                   | Smelting, calendering and processing of non-ferrous metals             | 26          | 35          | 24                        | Manufacture of basic metals                                                                                                                                                                       |

|      |        |                                                                      |      |      |         |                                                                                                                                 |
|------|--------|----------------------------------------------------------------------|------|------|---------|---------------------------------------------------------------------------------------------------------------------------------|
| I_06 | CMW    | Coal mining and washing                                              | 22   | 33   | 05 & 08 | Mining of coal and lignite & Other mining and quarrying                                                                         |
| I_14 | FPM    | Manufacture of food products                                         | 29   | 31   | 10      | Manufacture of food products                                                                                                    |
| I_33 | MP     | Metal products                                                       | 21   | 27   | 25      | Manufacture of fabricated metal products, except machinery and equipment                                                        |
| I_09 | MBNFM  | Mining and beneficiation of non-ferrous metal ores                   | 22   | 26   | 07      | Mining of metal ores                                                                                                            |
| I_31 | SCPFM  | Smelting, calendering and processing of ferrous metals               | 23   | 25   | 24      | Manufacture of basic metals                                                                                                     |
| I_44 | EPHGS  | Electric power and heat generation and supply                        | 20   | 21   | 35      | Electricity, gas, steam and air conditioning supply                                                                             |
| I_25 | PPCNFP | Petroleum processing, coking and nuclear fuels processing            | 15   | 16   | 19      | Manufacture of coke and refined petroleum products                                                                              |
| I_28 | CFM    | Manufacture of chemical fibres                                       | 9    | 15   | 20      | Manufacture of chemicals and chemical products                                                                                  |
| I_30 | ONMP   | Other non-metallic mineral products                                  | 9    | 10   | 23      | Manufacture of other non-metallic mineral products                                                                              |
| I_16 | TP     | Tobacco products                                                     | 5    | 6    | 12      | Manufacture of tobacco products                                                                                                 |
| I_35 | SPEM   | Manufacture of special-purpose equipment                             | 3    | 6    | 28 & 32 | Manufacture of machinery and equipment n.e.c. & Other manufacturing                                                             |
| I_41 | OM     | Other manufacturing                                                  | 5    | 5    | 32      | Other manufacturing                                                                                                             |
| I_81 | OSA    | Other service activities                                             | 4    | 4    | 81 & 96 | Services to buildings and landscape activities & Other personal service activities                                              |
| I_20 | WBRPS  | Wood processing and products of wood, bamboo, rattan, palm and straw | 2    | 2    | 16      | Manufacture of wood and of products of wood and cork, except furniture; manufacture of articles of straw and plaiting materials |
| I_21 | FM     | Manufacture of furniture                                             | 1    | 1    | 31      | Manufacture of furniture                                                                                                        |
| ...  |        |                                                                      |      |      |         |                                                                                                                                 |
| SUM  |        |                                                                      | 1700 | 2178 |         |                                                                                                                                 |



Table S 3 Partitioning around medoids (PAM) and expectation–maximization (EM) clustering methods based on yearly/weekly means of COD, NH<sub>3</sub>-N, pH and DO in wastewater discharges from the sewage outlets and in surface water from the sites in the YRB in 2016 and 2017

| Year of data | Input Data |          |                |                    |    |     |                    |    |    |     |                    |    |     |                    |                                                       |                                                         | Number (k) identification of clusters          |                                                        |                    |  |
|--------------|------------|----------|----------------|--------------------|----|-----|--------------------|----|----|-----|--------------------|----|-----|--------------------|-------------------------------------------------------|---------------------------------------------------------|------------------------------------------------|--------------------------------------------------------|--------------------|--|
|              | longitude  | latitude | Yearly means   |                    |    |     |                    |    |    |     | Weekly means       |    |     |                    |                                                       |                                                         |                                                |                                                        |                    |  |
|              |            |          | Sewage outlets |                    |    |     | Sites              |    |    |     | Sewage outlets     |    |     |                    | Sites                                                 |                                                         |                                                |                                                        |                    |  |
|              |            |          | COD            | NH <sub>3</sub> -N | pH | COD | NH <sub>3</sub> -N | DO | pH | COD | NH <sub>3</sub> -N | pH | COD | NH <sub>3</sub> -N | DO                                                    |                                                         |                                                |                                                        |                    |  |
|              |            |          |                |                    |    |     |                    |    |    |     |                    |    |     |                    |                                                       | Model                                                   | k                                              |                                                        |                    |  |
| 2016 & 2017  | PAM        |          |                |                    |    |     |                    |    |    |     |                    |    |     |                    |                                                       |                                                         | Optimum average silhouette width maximum (asw) | 4 (asw: 0.6154)                                        |                    |  |
| 2016         |            |          | EM_A           |                    |    |     |                    |    |    |     |                    |    |     |                    |                                                       |                                                         | Bayesian Information Criterion (BIC)           | 6 (BIC: -6412.77)                                      |                    |  |
|              |            |          | EM_B           |                    |    |     | /                  |    |    |     |                    |    |     |                    |                                                       |                                                         |                                                | Mclust VVI (diagonal, varying volume and shape) model  | 8 (BIC: -17467.57) |  |
| 2017         |            |          | EM_C           |                    |    |     |                    |    |    |     |                    |    |     |                    |                                                       |                                                         |                                                | 8 (BIC: -6997.97)                                      |                    |  |
|              |            |          | EM_D           |                    |    |     | /                  |    |    |     |                    |    |     |                    |                                                       |                                                         |                                                | 7 (BIC: -21390.04)                                     |                    |  |
| 2016         |            |          |                |                    |    |     | EM_SA              |    |    |     |                    |    |     |                    |                                                       |                                                         |                                                | Mclust EEV (ellipsoidal, equal volume and shape) model | 5 (BIC: -39.27)    |  |
| 2017         |            |          |                |                    |    |     | EM_SB              |    |    |     |                    |    |     |                    |                                                       |                                                         |                                                | 2 (BIC: -88.06)                                        |                    |  |
| 2016         |            |          |                |                    |    |     |                    |    |    |     | EM_E               |    |     |                    | Mclust VVI (diagonal, varying volume and shape) model | 3 (BIC: -800.56)                                        |                                                |                                                        |                    |  |
| 2017         |            |          |                |                    |    |     |                    |    |    |     | EM_F               |    |     |                    | Mclust VEI (diagonal, equal shape) model              | 2 (BIC: -611.20)                                        |                                                |                                                        |                    |  |
| 2016         |            |          |                |                    |    |     |                    |    |    |     |                    |    |     |                    | EM_SC                                                 | 2 (BIC: -285.2)                                         |                                                |                                                        |                    |  |
| 2017         |            |          |                |                    |    |     |                    |    |    |     |                    |    |     |                    | EM_SD                                                 | Mclust EVI (diagonal, equal volume, varying shape) mode |                                                | 3 (BIC: -376.86)                                       |                    |  |

Table S 4 Numbers and administrative regions of the 18 YRB sites and the 2213 YRB wastewater-generating factories in different spatial PAM clusters in 2016 and 2017

| PAM Cluster | Sample SUM | Number of Factories | of  | Number of Sites | Province |
|-------------|------------|---------------------|-----|-----------------|----------|
| PAM1        | 351        | 345                 | 321 | 5               | SC       |
|             |            |                     | 24  | 1               | CQ       |
|             |            |                     | 241 | 5               | HuN      |
| PAM2        | 551        | 544                 | 302 | 2 (HB1, HB3)    | HB       |
|             |            |                     | 1   |                 | AH       |
|             |            |                     | 20  | 1 (HB2)         | HB       |
| PAM3        | 453        | 451                 | 378 | 1 (HeN1)        | HeN      |
|             |            |                     | 48  |                 | AH       |
|             |            |                     | 5   |                 | JS       |
| PAM4        | 876        | 873                 | 220 | 1               | AH       |
|             |            |                     | 653 | 2               | JS       |
| SUM         | 2231       | 2213                |     | 18              |          |

Note: The names in parentheses are the site codes.

Table S 5 Unpolluted week percentages and yearly means of pH, DO, COD and NH<sub>3</sub>-N in surface water at the YRB sites in 2016 and 2017

| Site Code | Unpolluted<br>Week<br>Percentage | 2016   |        |        |                    | Unpolluted<br>Week<br>Percentage | 2017   |        |        |                    |
|-----------|----------------------------------|--------|--------|--------|--------------------|----------------------------------|--------|--------|--------|--------------------|
|           |                                  | pH     | DO     | COD    | NH <sub>3</sub> -N |                                  | pH     | DO     | COD    | NH <sub>3</sub> -N |
| SC1       | 98.1%                            | 8.04   | 9.07   | 1.85   | 0.17               | 98.1%                            | 7.61   | 8.98   | 1.67   | 0.11               |
|           |                                  | (0.03) | (0.11) | (0.48) | (1.81)             |                                  | (0.04) | (0.12) | (0.42) | (0.21)             |
| SC2       | 98.1%                            | 7.4    | 8.08   | 2.88   | 0.46               | 100.0%                           | 7.85   | 8.72   | 2.18   | 0.34               |
|           |                                  | (0.04) | (0.14) | (0.33) | (0.55)             |                                  | (0.06) | (0.11) | (0.27) | (0.32)             |
| SC3       | 100.0%                           | 7.31   | 8.63   | 1.98   | 0.18               | 100.0%                           | 8.10   | 8.99   | 1.88   | 0.20               |
|           |                                  | (0.04) | (0.11) | (0.25) | (0.23)             |                                  | (0.04) | (0.11) | (0.21) | (0.49)             |
| SC4       | 100.0%                           | 7.83   | 7.49   | 3.30   | 0.15               | 100.0%                           | 7.86   | 9.61   | 2.19   | 0.13               |
|           |                                  | (0.02) | (0.21) | (0.26) | (0.37)             |                                  | (0.04) | (0.17) | (0.23) | (0.28)             |
| CQ1       | 98.1%                            | 7.84   | 7.45   | 2.36   | 0.25               | 100.0%                           | 7.23   | 8.33   | 2.30   | 0.22               |
|           |                                  | (0.05) | (0.16) | (0.34) | (0.44)             |                                  | (0.05) | (0.23) | (0.58) | (0.43)             |
| SC5       | 98.1%                            | 8.31   | 9.03   | 1.85   | 0.08               | 100.0%                           | 7.75   | 8.51   | 1.94   | 0.10               |
|           |                                  | (0.02) | (0.16) | (0.55) | (0.86)             |                                  | (0.05) | (0.22) | (0.27) | (0.84)             |
| HB1       | 100.0%                           | 7.5    | 8.49   | 1.89   | 0.13               | 100.0%                           | 7.82   | 8.45   | 2.01   | 0.20               |
|           |                                  | (0.05) | (0.12) | (0.29) | (1.16)             |                                  | (0.04) | (0.3)  | (0.25) | (0.62)             |
| HB2       | 100.0%                           | 7.95   | 8.61   | 2.11   | 0.14               | 100.0%                           | 7.12   | 6.59   | 2.09   | 0.10               |
|           |                                  | (0.04) | (0.09) | (0.14) | (0.3)              |                                  | (0.02) | (0.16) | (0.18) | (0.44)             |
| HeN1      | 100.0%                           | 7.94   | 9.12   | 2.10   | 0.08               | 100.0%                           | 7.49   | 8.34   | 2.55   | 0.05               |
|           |                                  | (0.05) | (0.12) | (0.13) | (0.48)             |                                  | (0.03) | (0.15) | (0.17) | (1.5)              |
| HuN1      | 98.1%                            | 7.63   | 10     | 1.92   | 0.26               | 98.1%                            | 6.86   | 7.20   | 4.59   | 0.26               |
|           |                                  | (0.04) | (0.26) | (0.57) | (1.5)              |                                  | (0.05) | (0.16) | (0.22) | (0.75)             |
| HuN2      | 96.2%                            | 7.89   | 8.4    | 1.63   | 0.58               | 98.1%                            | 7.64   | 7.39   | 2.75   | 0.32               |
|           |                                  | (0.07) | (0.13) | (0.3)  | (0.47)             |                                  | (0.02) | (0.15) | (0.2)  | (0.46)             |
| HuN3      | 84.9%                            | 7.12   | 6.22   | 1.87   | 0.38               | 90.6%                            | 7.31   | 7.54   | 2.54   | 0.73               |
|           |                                  | (0.06) | (0.2)  | (0.37) | (1.02)             |                                  | (0.02) | (0.15) | (0.33) | (0.48)             |
| HuN4      | 75.5%                            | 7.1    | 6.16   | 2.01   | 0.17               | 92.5%                            | 7.52   | 8.97   | 2.87   | 0.23               |
|           |                                  | (0.05) | (0.25) | (0.28) | (0.55)             |                                  | (0.06) | (0.21) | (0.34) | (0.4)              |
| HuN5      | 100.0%                           | 7.64   | 7.75   | 1.97   | 0.18               | 100.0%                           | 7.80   | 7.91   | 2.63   | 0.28               |
|           |                                  | (0.04) | (0.14) | (0.2)  | (0.3)              |                                  | (0.07) | (0.17) | (0.32) | (0.58)             |
| HB3       | 88.7%                            | 7.61   | 8.51   | 2.42   | 0.17               | 100.0%                           | 7.65   | 8.01   | 1.45   | 0.17               |
|           |                                  | (0.05) | (0.26) | (0.31) | (0.44)             |                                  | (0.03) | (0.13) | (0.14) | (0.49)             |
| AH1       | 100.0%                           | 7.47   | 7.74   | 2.54   | 0.16               | 100.0%                           | 8.01   | 7.73   | 2.05   | 0.21               |
|           |                                  | (0.03) | (0.18) | (0.18) | (0.38)             |                                  | (0.03) | (0.17) | (0.22) | (0.49)             |
| JS1       | 98.1%                            | 7.91   | 7.8    | 2.54   | 0.23               | 92.5%                            | 8.08   | 9.68   | 1.71   | 0.21               |
|           |                                  | (0.03) | (0.24) | (0.27) | (0.41)             |                                  | (0.06) | (0.28) | (0.77) | (0.44)             |
| JS2       | 94.3%                            | 7.32   | 7.99   | 2.66   | 0.22               | 100.0%                           | 7.42   | 7.69   | 2.64   | 0.24               |
|           |                                  | (0.02) | (0.22) | (0.31) | (0.69)             |                                  | (0.08) | (0.25) | (0.41) | (1.07)             |

Note: Values in parentheses represent coefficients of variation calculated from the weekly means of each monitoring indicator.

Table S 6 Numbers and percentages of YRB sewage outlets in each EM cluster based on the yearly means of COD, NH<sub>3</sub>-N, and pH in wastewater discharged in 2016 and 2017

| Year | Cluster | 1       | 2       | 3       | 4       | 5       | 6       | 7       | 8       | SUM  |
|------|---------|---------|---------|---------|---------|---------|---------|---------|---------|------|
| 2016 | EM_A    | 46      | 8       | 68      | 66      | 185     | 94      | /       | /       | 467  |
|      |         | (9.8%)  | (1.7%)  | (14.5%) | (14.0%) | (39.4%) | (20.0%) | /       | /       |      |
|      | EM_B    | 370     | 96      | 195     | 49      | 420     | 186     | 48      | 68      | 1432 |
|      |         | (25.7%) | (6.7%)  | (13.6%) | (3.4%)  | (29.2%) | (12.9%) | (3.3%)  | (4.7%)  |      |
| 2017 | EM_C    | 8       | 6       | 146     | 78      | 87      | 66      | 26      | 111     | 528  |
|      |         | (1.5%)  | (1.1%)  | (27.5%) | (14.7%) | (16.4%) | (12.5%) | (4.9%)  | (20.9%) |      |
|      | EM_D    | 461     | 272     | 93      | 155     | 506     | 62      | 262     | /       | 1811 |
|      |         | (25.3%) | (14.9%) | (5.1%)  | (8.5%)  | (27.8%) | (3.4%)  | (14.4%) | /       |      |

Note: Percentages in parentheses represent proportions of sewage outlets in a specific cluster.

Table S 7 YRB sewage outlet numbers in Clusters HPW (heavily polluted wastewater) and UPW (unpolluted wastewater) in different industries by EM clustering in 2016 and 2017

| Industry Code | Industry Acronym | 2016     |            |            |            |            |          | 2017     |            |            |            |            |          | ISIC Rev.4<br>Division ID |
|---------------|------------------|----------|------------|------------|------------|------------|----------|----------|------------|------------|------------|------------|----------|---------------------------|
|               |                  | HPW_2016 | HPW_EM_A_1 | HPW_EM_A_2 | HPW_EM_B_8 | HPW_EM_B_4 | UPW_2016 | HPW_2017 | HPW_EM_C_7 | HPW_EM_C_2 | HPW_EM_D_3 | HPW_EM_D_6 | UPW_2017 |                           |
| I_06          | CMW              | 1        | 1          | -          | -          | 1          | 4        | -        | -          | -          | -          | -          | 4        | 05 & 08                   |
| I_09          | MBNFM0           | -        | -          | -          | -          | -          | 2        | -        | -          | -          | -          | -          | 4        | 07                        |
| I_13          | ASFP             | 7        | 1          | -          | 3          | 3          | -        | 5        | 1          | -          | 4          | 1          | 3        | 10                        |
| I_14          | FPM              | 4        | 1          | -          | 3          | 1          | 3        | 11       | 1          | -          | 7          | 4          | 1        | 10                        |
| I_15          | BM               | 11       | 1          | -          | 9          | 1          | 8        | 16       | -          | -          | 12         | 4          | 11       | 10 & 11                   |
| I_16          | TP               | 1        | 1          | -          | 1          | -          | 1        | 3        | 1          | 1          | 1          | 1          | 1        | 12                        |
| I_17          | TI               | 12       | 10         | 1          | 3          | 2          | 1        | 20       | 3          | 2          | 5          | 15         | 1        | 13                        |
| I_19          | LFFF             | 5        | 2          | -          | 4          | 1          | -        | 8        | 1          | -          | 3          | 5          | -        | 14 & 15                   |
| I_20          | WBRPS            | 1        | -          | 1          | -          | -          | -        | -        | -          | -          | -          | -          | -        | 16                        |
| I_21          | FM               | -        | -          | -          | -          | -          | 1        | -        | -          | -          | -          | -          | -        | 31                        |
| I_22          | PMPA             | 6        | 3          | 1          | 3          | 1          | 12       | 12       | 3          | -          | 2          | 10         | 7        | 17                        |
| I_25          | PPCNFP           | 1        | -          | -          | 1          | -          | 3        | 1        | -          | -          | 1          | -          | 2        | 19                        |
| I_26          | CCPM             | 35       | 7          | 2          | 15         | 19         | 12       | 25       | 4          | -          | 20         | 5          | 9        | 20                        |
| I_27          | PMCM             | 7        | 3          | -          | 6          | -          | 3        | 7        | 2          | -          | 5          | 2          | 5        | 21                        |
| I_28          | CFM              | -        | -          | -          | -          | -          | -        | 3        | -          | -          | 2          | 1          | -        | 20                        |
| I_30          | ONMP             | 2        | 1          | -          | 1          | 1          | 2        | 1        | -          | -          | -          | 1          | 1        | 23                        |
| I_31          | SCPFM            | -        | -          | -          | -          | -          | 4        | -        | -          | -          | -          | -          | 7        | 24                        |
| I_32          | SCPNFM           | 2        | 1          | -          | -          | 2          | 3        | 2        | 1          | -          | 2          | -          | 4        | 24                        |
| I_33          | MP               | 3        | -          | 1          | 1          | 2          | 2        | 4        | -          | 1          | 2          | 1          | 1        | 25                        |
| I_35          | SPEM             | 2        | 2          | -          | 1          | 1          | -        | 1        | 1          | -          | 1          | -          | -        | 28 & 32                   |
| I_38          | EMEM             | -        | -          | -          | -          | -          | 2        | 2        | -          | 2          | -          | -          | 5        | 27                        |
| I_39          | CCOEEM           | 12       | 6          | -          | 7          | 2          | 6        | 15       | 6          | -          | 14         | 2          | 6        | 26                        |
| I_41          | OM               | 2        | -          | -          | 2          | -          | 1        | 2        | -          | -          | 2          | -          | 1        | 32                        |
| I_44          | EPHGS            | 1        | 1          | -          | -          | -          | 2        | -        | -          | -          | -          | -          | 5        | 35                        |
| I_46          | WPS              | 21       | 3          | 4          | 9          | 11         | 275      | 16       | 3          | -          | 14         | 2          | 345      | 36 & 37                   |
| I_77          | EPER             | 6        | 2          | -          | 4          | 1          | 14       | 9        | 1          | -          | 5          | 4          | 18       | 38 & 39<br>& 91           |
| I_81          | OSA              | -        | -          | -          | -          | -          | 1        | 1        | -          | -          | -          | 1          | 1        | 81 & 96                   |
| SUM           |                  | 142      |            |            |            |            | 362      | 164      |            |            |            |            | 442      |                           |

Note: Hyphen(-) represents zero. HPW\_EM\_A\_1 represents EM\_A\_1 cluster with high COD and NH<sub>3</sub>-N; HPW\_EM\_A\_2 represents EM\_A\_2 cluster with abnormal pH; HPW\_EM\_B\_8 represents EM\_B\_8 cluster with high COD and NH<sub>3</sub>-N; HPW\_EM\_B\_4 represents EM\_B\_4 cluster with high NH<sub>3</sub>-N; HPW\_EM\_C\_7 represents EM\_C\_7 cluster with high COD and NH<sub>3</sub>-N; HPW\_EM\_C\_2 represents EM\_C\_2 cluster with abnormal pH; HPW\_EM\_D\_3 represents EM\_D\_3 cluster with high COD and NH<sub>3</sub>-N; HPW\_EM\_D\_6 represents EM\_D\_6 cluster with high COD.

Table S 8 Numbers of the YRB factories with heavily polluted wastewater discharges (HPW) and their administrative regions and industrial classes in the heavily polluted zone (HPZ) in 2016

| Province | City               | Industry |     |    |      |       |      |      |      |      |        |    |      |        |     |    | SUM of factories |
|----------|--------------------|----------|-----|----|------|-------|------|------|------|------|--------|----|------|--------|-----|----|------------------|
|          |                    | 13       | 14  | 17 | 19   | 20    | 22   | 26   | 27   | 30   | 32     | 33 | 35   | 39     | 46  |    |                  |
|          |                    | ASFP     | FPM | TI | LFFF | WBRPS | PMPA | CCPM | PMCM | ONMP | SCPNFM | MP | SPEM | CCOEEM | WPS |    |                  |
| HuN      | Changde            | -        | -   | -  | -    | -     | -    | 2    | 1    | -    | -      | -  | -    | -      | -   | 3  |                  |
|          | Loudi              | -        | -   | -  | -    | -     | -    | 2    | -    | -    | -      | -  | -    | -      | -   | 2  |                  |
|          | Yueyang            | 1        | -   | -  | -    | -     | -    | -    | -    | -    | -      | -  | -    | -      | 1   | 2  |                  |
|          | Chenzhou           | -        | -   | -  | -    | -     | -    | 1    | -    | -    | -      | -  | -    | -      | -   | 1  |                  |
|          | Hengyang           | -        | -   | -  | -    | -     | -    | 1    | -    | -    | -      | -  | -    | -      | -   | 1  |                  |
|          | Huaihua            | -        | -   | -  | -    | -     | 1    | -    | -    | -    | -      | -  | -    | -      | -   | 1  |                  |
|          | Yongzhou           | -        | -   | -  | -    | -     | -    | -    | -    | -    | 1      | -  | -    | -      | -   | 1  |                  |
|          | Huanggang          | -        | -   | 1  | -    | 1     | -    | 1    | 1    | -    | -      | -  | -    | -      | 1   | 5  |                  |
|          | Huangshi           | -        | -   | -  | -    | -     | -    | 1    | -    | -    | -      | -  | -    | -      | -   | 1  |                  |
|          | Jingmen            | -        | -   | -  | -    | -     | -    | 1    | -    | -    | -      | -  | -    | -      | -   | 1  |                  |
| HB       | Jingzhou           | -        | -   | -  | -    | -     | 1    | 1    | -    | -    | -      | -  | -    | -      | -   | 2  |                  |
|          | Municipal counties | -        | -   | 1  | -    | -     | -    | -    | -    | -    | -      | -  | 1    | -      | -   | 2  |                  |
|          | Suizhou            | -        | -   | -  | 1    | -     | -    | -    | -    | -    | -      | -  | -    | -      | -   | 1  |                  |
|          | Wuhan              | 1        | -   | 2  | -    | -     | -    | -    | -    | -    | -      | -  | -    | 2      | 1   | 6  |                  |
|          | Xianning           | -        | -   | -  | -    | -     | -    | -    | -    | 1    | -      | -  | -    | -      | -   | 1  |                  |
|          | Xiaogan            | -        | -   | -  | -    | -     | -    | -    | 1    | -    | -      | -  | -    | -      | -   | 1  |                  |
|          | Yichang            | -        | 1   | -  | -    | -     | 2    | 2    | -    | -    | -      | 1  | -    | -      | -   | 6  |                  |
|          | SUM of factories   | 2        | 1   | 4  | 1    | 1     | 4    | 12   | 3    | 1    | 1      | 1  | 1    | 2      | 3   | 37 |                  |

Note: Hyphen(-) represents zero.

Table S 9 Numbers of the YRB factories with heavily polluted wastewater discharges (HPW) and their administrative regions and industrial classes in the heavily polluted zone (HPZ) in 2017

| Province         | City               | Industry |     |    |    |     |      |      |      |      |    |      |         | SUM of factories |
|------------------|--------------------|----------|-----|----|----|-----|------|------|------|------|----|------|---------|------------------|
|                  |                    | 13       | 14  | 16 | 17 | 19  | 22   | 26   | 27   | 30   | 33 | 35   | 39      |                  |
|                  |                    | ASFP     | FPM | TP | TI | LFF | PMPA | CCPM | PMCM | ONMP | MP | SPEM | CCOEEEM |                  |
| HuN              | Changsha           | -        | 1   | 1  | -  | -   | -    | -    | -    | 1    | -  | -    | -       | 3                |
|                  | Changde            | -        | -   | -  | -  | -   | 1    | -    | 1    | -    | -  | -    | -       | 2                |
|                  | Chenzhou           | -        | -   | -  | -  | -   | -    | -    | 1    | -    | -  | -    | -       | 1                |
|                  | Huaihua            | -        | -   | -  | -  | -   | 1    | -    | -    | -    | -  | -    | -       | 1                |
|                  | Loudi              | -        | -   | -  | -  | -   | -    | 1    | -    | -    | -  | -    | -       | 1                |
|                  | Shaoyang           | -        | -   | -  | -  | 1   | -    | -    | -    | -    | -  | -    | -       | 1                |
|                  | Zhangjiajie        | -        | 1   | -  | -  | -   | -    | -    | -    | -    | -  | -    | -       | 1                |
|                  | Huanggang          | -        | -   | -  | 1  | -   | -    | 1    | 2    | -    | -  | -    | -       | 4                |
| HB               | Jingmen            | -        | -   | -  | -  | 1   | -    | -    | -    | -    | -  | -    | -       | 1                |
|                  | Municipal counties | -        | -   | -  | 1  | -   | -    | -    | -    | -    | -  | 1    | -       | 2                |
|                  | Wuhan              | 1        | -   | -  | 1  | -   | -    | -    | -    | -    | -  | -    | 2       | 4                |
|                  | Yichang            | 1        | 1   | -  | -  | -   | 2    | -    | 1    | -    | 1  | -    | -       | 6                |
| SUM of factories |                    | 2        | 3   | 1  | 3  | 2   | 4    | 2    | 5    | 1    | 1  | 1    | 2       | 27               |

Note: Hyphen(-) represents zero.
